# Supplementary material for: Rapid quantitative detection of luteolin using an electrochemical sensor based on electrospinning of carbon nanofibers doped with single-walled carbon nanoangles
Source: Royal Society of Chemistry journal article supplement (doi:10.1039/d3ay00497j), 2023-01-01
Supplement: d3ay00497j1.pdf [file d3ay00497j1.pdf]

## Supporting information

### Rapid quantitative detection of luteolin using electrochemical sensor based on electrospinning of carbon nanofibers doped with single- walled carbon nanoangles

LiwenZhang<sup>a</sup>, DanfengQin<sup>a,b,\*</sup>, Jun Feng<sup>a,b</sup>, Tingfan Tang<sup>a</sup>, Hao Cheng<sup>a,c,\*</sup>

<sup>a</sup>Guangxi Key Laboratory of Green Processing of Sugar Resources, College of Biological and Chemical Engineering, Guangxi University of Science and Technology, Liuzhou 545006, Guangxi province, P.R. China.

<sup>b</sup>School of Medicine Guangxi University of Science and Technology, Liuzhou 545006, Guangxi province, P.R. China.

<sup>c</sup>Province and Ministry Co-sponsored Collaborative Innovation Center of Sugarcane and Sugar Industry, Nanning 530004, Guangxi province, People's Republic of China

\*Corresponding author.

E-mail address: chenghao@gxust.edu.cn (H. Cheng), qindanfeng@gxust.edu.cn (D. Qin)

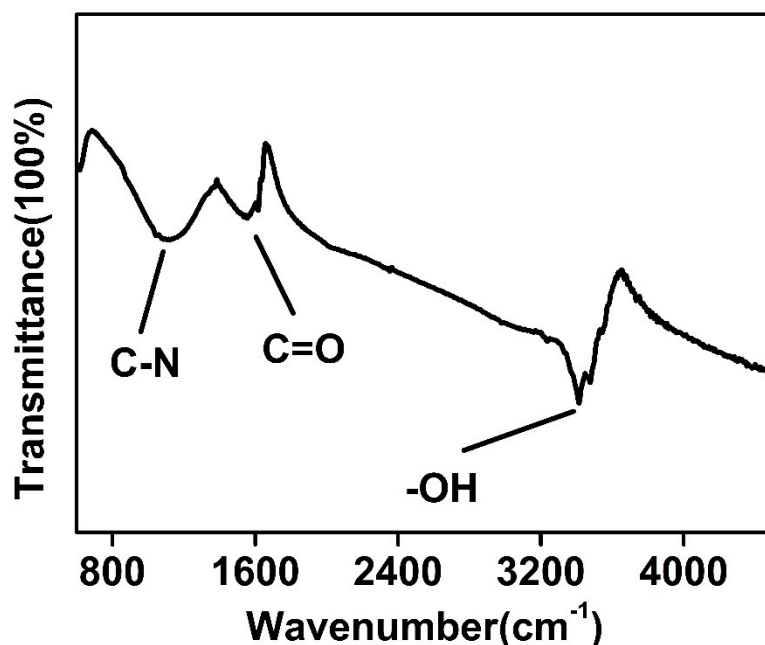

Figure S1. FT-IR spectrum of SWCNHs/CNFs.

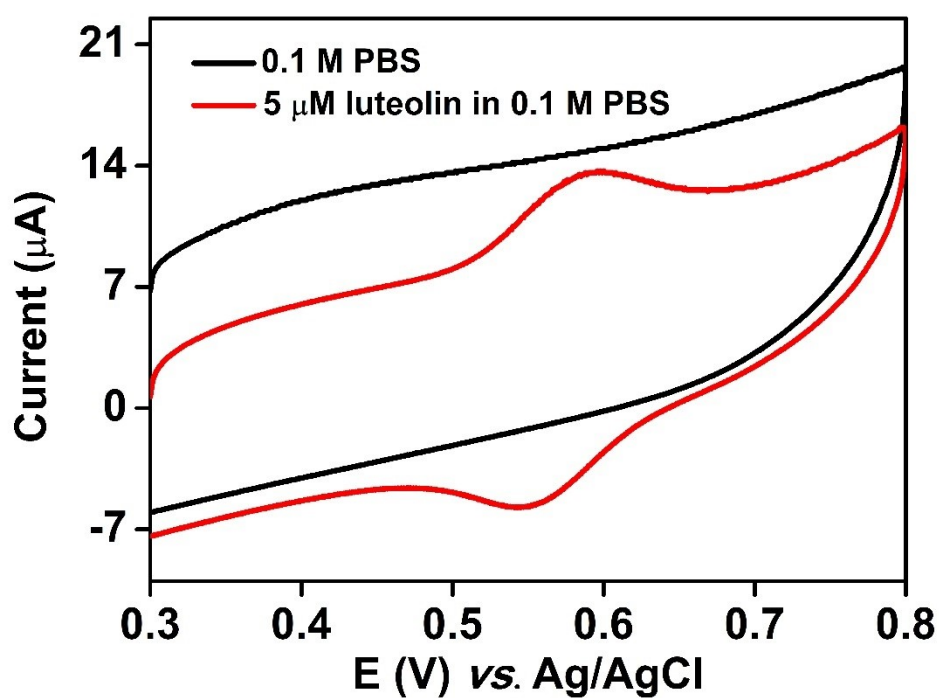

**Figure S2.** CV curves of SWCNHs/CNFs/GCE in different solution.

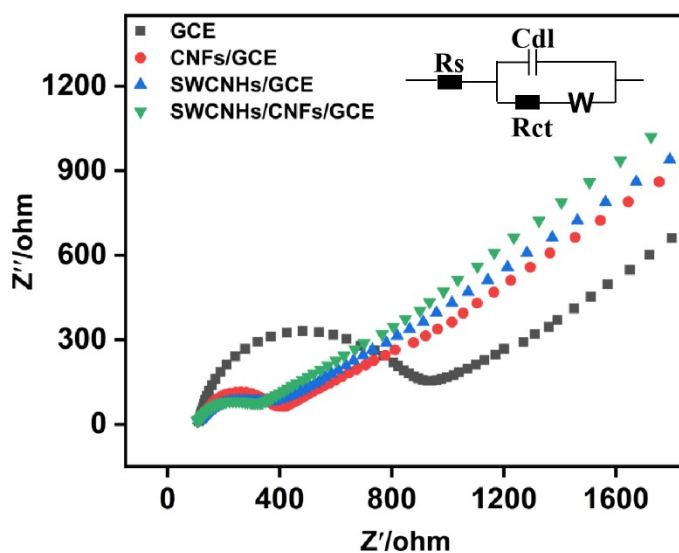

**Figure S3.** EIS curves of different modified electrodes in 5 mM  $[\text{Fe}(\text{CN})_6]^{3-/4-}$  containing 0.1 M KCl.

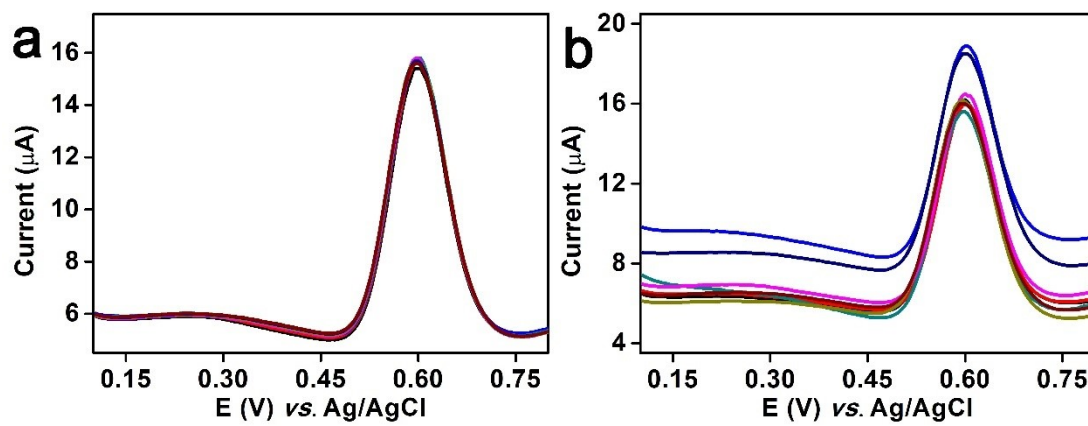

**Figure S4.** DPV curves in (a) repeatability and (b) reproducibility of the SWCNHs/CNFs/GCE.

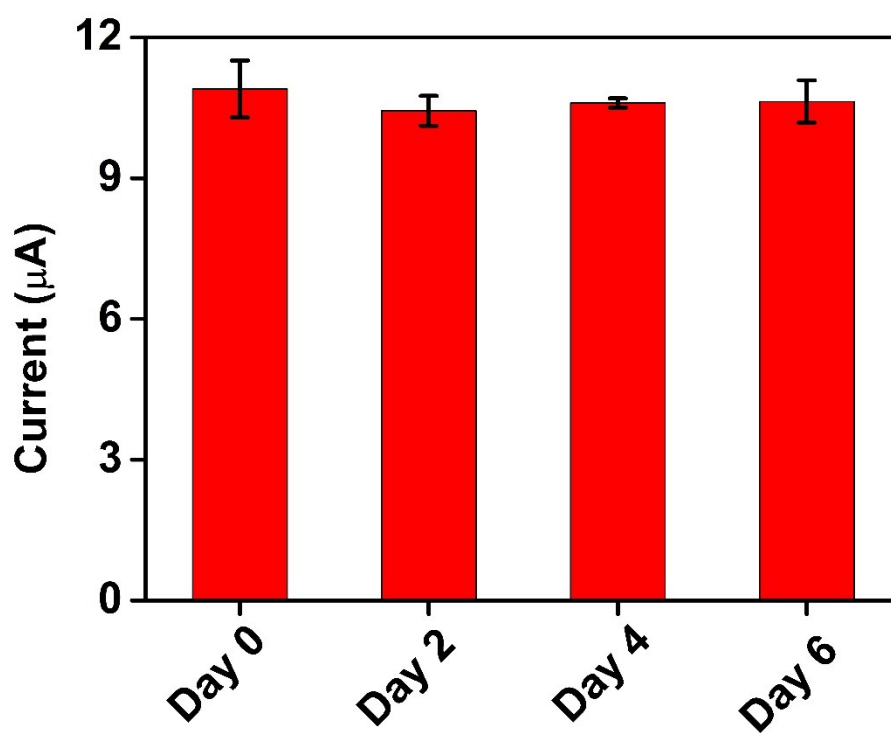

**Figure S5.** Stability research by SWCNHs/CNFs/GCEs. (n=3)

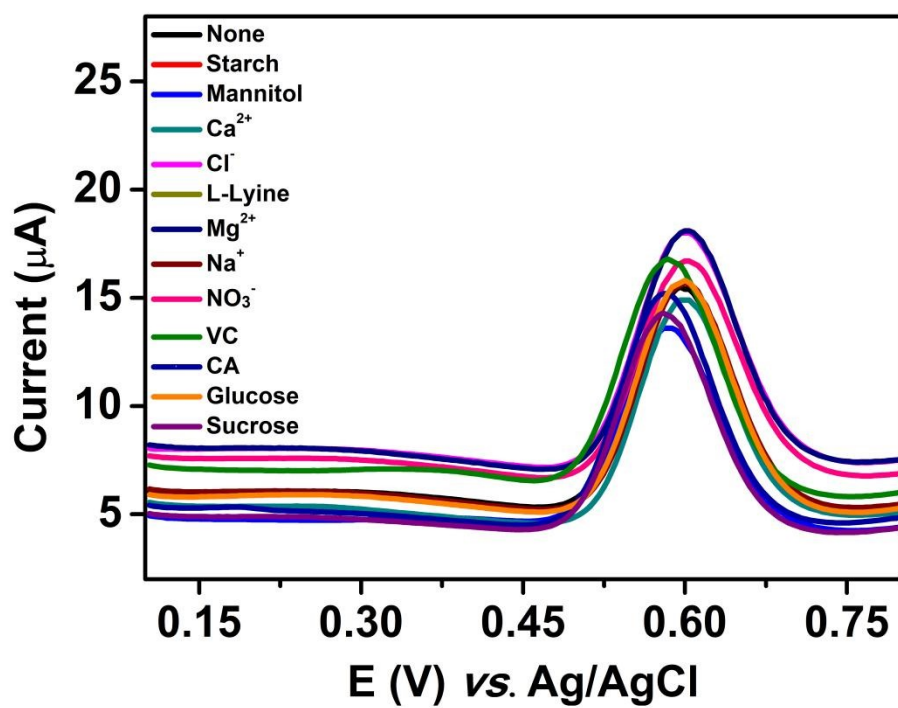

**Figure S6.** DPV curves of SWCNHs/CNFs/GCE for detection of 5 μM luteolin containing interfering compounds.
